# Supplementary material for: Controlling the generation of bilayer and multilayer vesicles in block copolymer/epoxy blends by a slow photopolymerization process
Source: Royal Society of Chemistry journal article supplement (doi:10.1039/c7sm01660c), 2017-01-01
Supplement: c7sm01660c1.pdf [file c7sm01660c1.pdf]

SM-ART-08-2017-001660 (REVIEW ONLY)

## Supporting Information to

### **Controlling the generation of bilayer and multilayer vesicles in block copolymer / epoxy blends by a slow photopolymerization process**

J. Puig,<sup>a</sup> M. Ceolín,<sup>b</sup> R. J. J. Williams,<sup>a</sup> W. F. Schroeder,<sup>a</sup> and I. A. Zucchi<sup>a,\*</sup>

<sup>a</sup> *Institute of Materials Science and Technology (INTEMA), University of Mar del Plata and National Research Council (CONICET), J. B. Justo 4302, B7608FDQ, Mar del Plata, Argentina.*

<sup>b</sup> *Instituto de Investigaciones Fisicoquímicas Teóricas y Aplicadas (INIFTA), Universidad Nacional de La Plata, CONICET, CC 16-Suc. 4, La Plata, Argentina*

\*to whom correspondence should be addressed

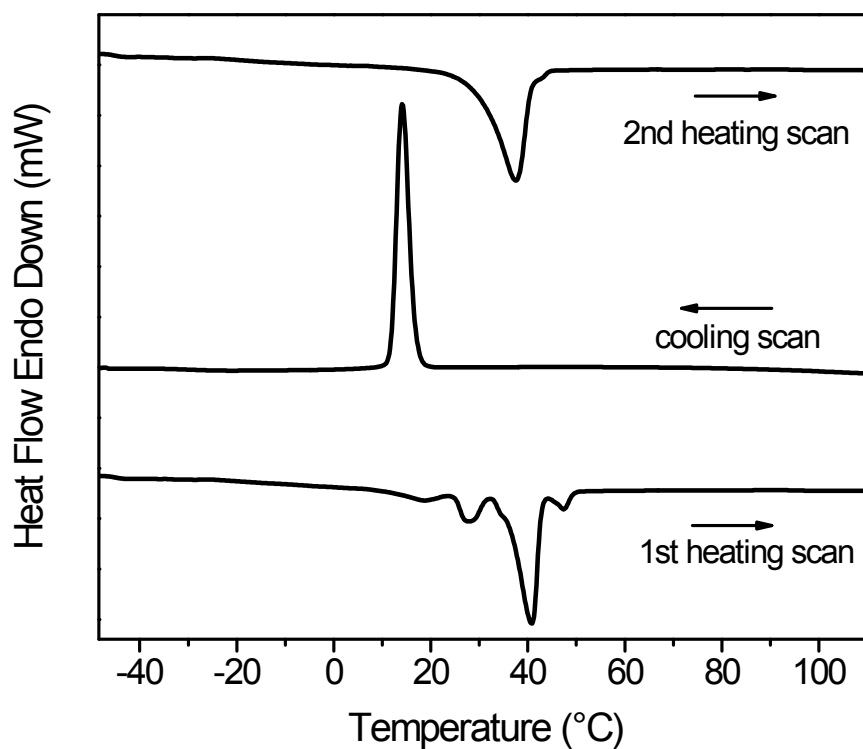

**Figure S-1:** DSC thermograms (at 10°C/min) of the neat BCP.

*Differential Scanning Calorimetry (DSC).* The calorimetric measurement was made on a Perkin-Elmer Pyris 1 differential scanning calorimeter under a dry nitrogen atmosphere. Heating and cooling scans were made at 10°C/min.

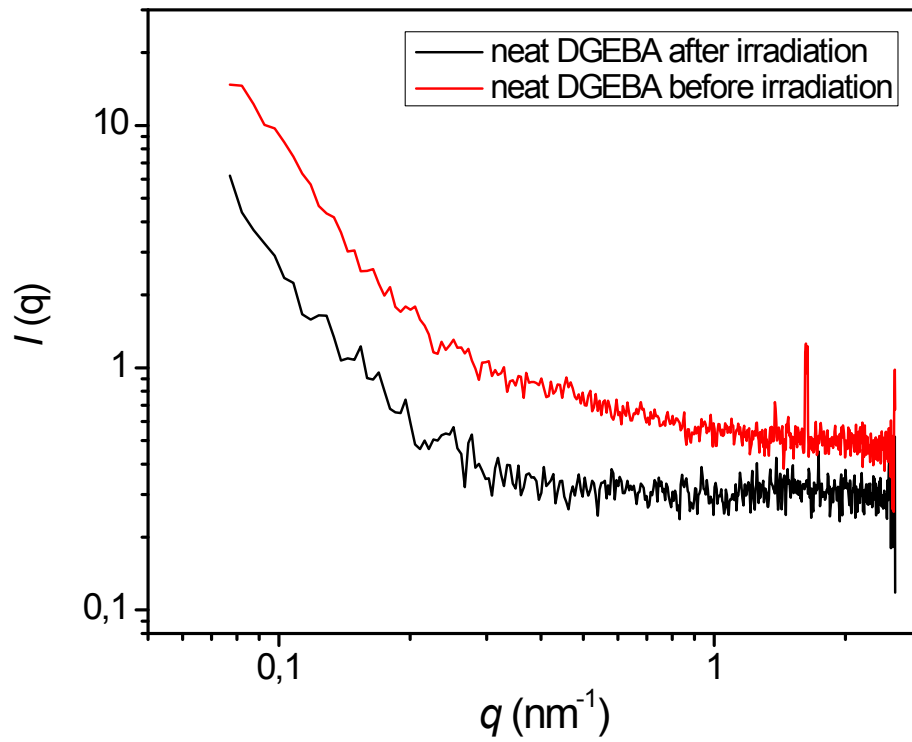

**Figure S-2:** SAXS measurements of the pristine epoxy resin before irradiation and after 240 min of irradiation.

**Section S-3:** SAXS data was fitted using the SASfit software package in the  $q$ -region from 0.1 to 0.7 nm<sup>-1</sup>. The models used are implemented into the SASfit package and were used without modification (*Kohlbrecher, J. SASfit: A program for fitting simple structural models to small angle scattering data.* <https://kur.web.psi.ch/sans1/SANSSoft/sasfit.pdf>). The models were selected taking into account the structure inferred from the Guinier analysis of the slope at the low- $q$  region. The fitting results for the sample containing 10 wt% PEB-*b*-PEO photocured at room temperature are summarized in the following table:

| <b>Irradiation time<br/>min</b> | <b>Model</b> | <b>R nm</b> | <b>R<sub>c</sub> nm</b> | <b>L<sub>cyl</sub> nm</b> | <b>t<sub>h</sub> nm</b> | <b>t<sub>i</sub> nm</b> |
|---------------------------------|--------------|-------------|-------------------------|---------------------------|-------------------------|-------------------------|
| 75                              | Sphere       | 5.6         |                         |                           |                         |                         |
| 95                              | Sphere       | 7.2         |                         |                           |                         |                         |
| 105                             | Cylinder     | 4.0         |                         | 40.0                      |                         |                         |
| 135                             | Cylinder     | 4.0         |                         | 44.0                      |                         |                         |
|                                 | Vesicle      |             | 9.0                     |                           | 4.5                     | 3.6                     |
| 145                             | Vesicle      |             | 12.0                    |                           | 5.0                     | 3.8                     |
| 195                             | Vesicle      |             | 12.0                    |                           | 5.1                     | 4.2                     |
| 235                             | Vesicle      |             | 12.0                    |                           | 4.8                     | 4.0                     |

R: radius, R<sub>c</sub>: radius vesicle core, L: length, t<sub>h</sub>: thickness of outer part of bilayer thickness, t<sub>i</sub>: thickness of inner part of bilayer.

For the scattering profiles obtained at 75 and 95 min a sphere model was employed. The polydispersity distribution of the radius of the spherical particles was included as a LogNormal-distribution. Also, a structure factor was needed to introduce an interparticle interaction. The fitting results obtained were the mean radius of the particle: 5.6 (standard deviation = ± 0.3 nm) and 7.2 nm (standard deviation = ± 0.7 nm) for 75 and 95 min of irradiation, respectively.

For SAXS data obtained at 105 min of irradiation, a cylinder model was used. A LogNormal radius distribution was considered. In this case, the contribution of the interparticle interaction was not required. The fitting results obtained were a mean radius of 4.0 nm (standard deviation = ± 0.4 nm) and a length of 40.0 nm.

For the scattering profile obtained at 135 min, a model using a coexistence of cylinders and bilayer vesicles was employed. For both populations, a LogNormal radius distribution was introduced. For bilayer vesicles, the introduction of a structure factor was required to taking into account the interparticle interaction. The fitting results obtained for the cylinders are a mean radius of 4.0 (standard deviation =  $\pm 0.4$  nm) nm and a length of 44.0 nm and, for the vesicles, a mean diameter of 41.0 nm ( $2R_c+2t_h+4t_t$ ) and a bilayer thickness equal to 11.7 nm ( $t_h+2t_t$ ).

The SAXs diagrams from 145 min to 235 min of irradiation were fitting using only a bilayer vesicles model. A LogNormal radius distribution and a factor structure were required to fit the data. As a result, the mean diameter ( $2R_c+2t_h+4t_t$ ) of the overall particles could be obtained: of 49.2, 51.0 and 50.0 nm corresponding to 145, 195 and 235 min of reaction. For all these cases, the wall thickness corresponding to the bilayer membrane remained constant in approximately 13.0 nm ( $t_h+2t_t$ ). The following is a representation of the vesicle with the fitting structural parameters as reference:

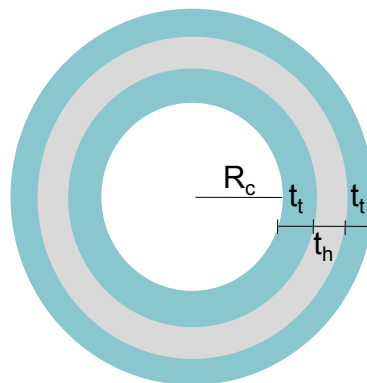

**Section S-4:** We have performed rheological measurements with the aim to estimate the conversion in the gel point for the sample modified with 10 wt % BCP. For this test, we measured the storage modulus ( $G'$ ) and loss modulus ( $G''$ ) for samples irradiated for different times under identical conditions to those used in the work. Measurements were performed in an Anton Paar rheometer (model Physica MCR-301) with a parallel-plate configuration (diameter  $D = 25$  mm, gap  $H = 1$  mm) in oscillatory mode with a 1% amplitude at a frequency of 1 Hz. The conversion vs. irradiation time data showed in Figure 2 of the manuscript were used to transform the time data of the rheology experiment into conversion data. The gel point took place at a conversion value around 30%, as determined by the crossover of  $G'$  and  $G''$ .

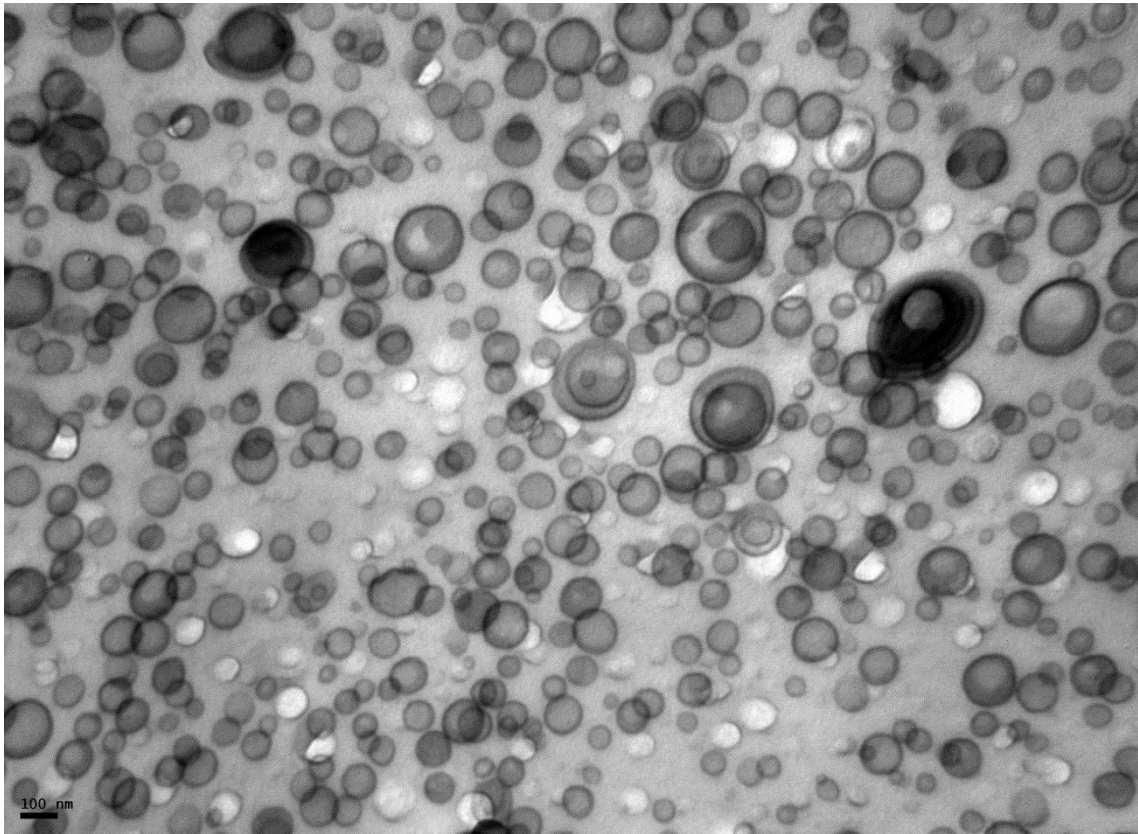

**Figure S-5:** TEM image of sample containing 10 wt% PEB-*b*-PEO photocured 4h at room temperature and postcured 1h at 120°C.

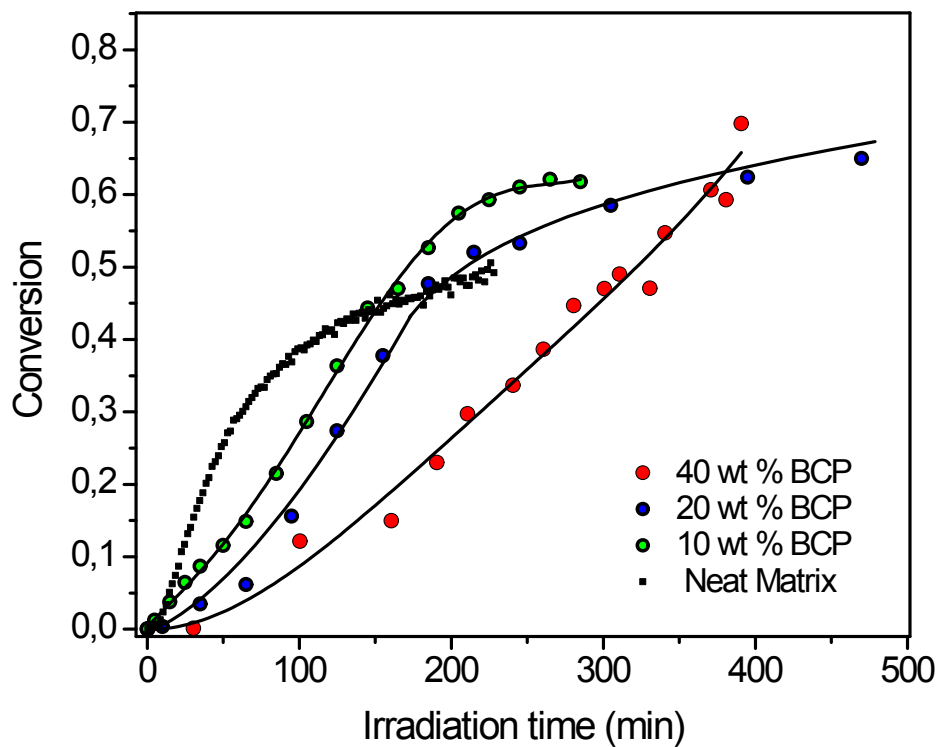

**Figure S-6:** Conversion of epoxy groups as a function of irradiation time for blends containing 0, 10, 20 and 40 wt % PEB-*b*-PEO photocured at room temperature. Lines are drawn to guide the eye.
